# Supplementary material for: Phosphorus doping stabilized LiNi0.83Co0.12Mn0.05O2 with enhanced elevated-temperature electrochemical performance for Li-ion batteries
Source: Royal Society of Chemistry journal article supplement (doi:10.1039/d2ta02472a), 2022-01-01
Supplement: d2ta02472a1.pdf [file d2ta02472a1.pdf]

## Supporting Information

### **Phosphorus doping stabilized $\text{LiNi}_{0.83}\text{Co}_{0.12}\text{Mn}_{0.05}\text{O}_2$ with enhanced elevated temperature electrochemical performance for Li-ion battery**

Xin Wang, Xiaoyu Zhang, Fangyuan Cheng, Peng Wei, Qi Li, Jia Xu, Qing Li, Yue Xu,

Shixiong Sun, Chun Fang\*, Jiantao Han\*

*State Key Laboratory of Material Processing and Die & Mould Technology, School of Materials Science and Engineering, Huazhong University of Science and Technology, Wuhan, Hubei 430074, China*

#### **Corresponding author**

\* E-mail addresses: [fangchun@hust.edu.cn](mailto:fangchun@hust.edu.cn) (C. Fang)

[jthan@hust.edu.cn](mailto:jthan@hust.edu.cn) (J.T. Han).

#### **Author Contributions**

X.W did the main work and others provided important help.

## **Additional computational details**

### *1. The time to break a P-O bond of $PO_4^{3-}$ .*

The Vienna Ab Initio Package (VASP)[1,2] was employed to perform all the spin-polarized density functional theory (DFT) calculations within the generalized gradient approximation (GGA) using the PBE formulation.[3] The projected augmented wave (PAW) potentials[4,5] was chosen to describe the ionic cores and take valence electrons into account using a plane wave basis set with a kinetic energy cutoff of 400 eV. The correction function Grimme is used to correct the van der Waals force (vdW) dispersion interaction.[6] Partial occupancies of the Kohn-Sham orbitals were allowed using the Gaussian smearing method and a width of 0.1 eV. The electronic energy was considered self - consistent when the energy change was smaller than  $10^{-6}$  eV. A geometry optimization was considered convergent when the force imposed on each atom was smaller than 0.01 eV/Å. The atomic vibration frequencies were calculated via the finite displacement methods.[7] The CINEB methods[8] were used to calculate the energies of the transition states during P - O bond breaking.

The structure of  $PO_4^{3-}$  located in the supercell of 30.09 Å \*18.09 Å \*18.09 Å were optimized. The k - points were set as  $1 \times 2 \times 2$  with the M - P sampling methods. All the bond lengths of P-O were about 1.56 Å and all the bond angles of P-O-P were about 109.5°

The time to break a P-O bond is defined as follow:

$$t = \frac{1}{\nu_0} \exp\left(\frac{E_a}{k_B T}\right)$$

where  $\nu_0$  is the vibration frequency of the O atom,  $E_a$  is the energy barrier corresponding to the P-O bond breaking,  $k_B$  is the Boltzmann constant, and  $T$  is the temperature.

The O atom vibration frequencies of the Longitudinal wave and two transverse waves are 2.30E13Hz, 6.74E12Hz and 6.58E12Hz, respectively. The vibration direction of the Longitudinal wave is along the P-O bond, which is responsible for the P-O bond breaking. Therefore, the vibration frequencies of the Longitudinal wave 2.30E13Hz was used to calculate the time to break a P-O bond of  $\text{PO}_4^{3-}$ .

## 2. *Doping sites of P atoms.*

Partial occupancies of the Kohn-Sham orbitals were allowed using the Gaussian smearing method and a width of 0.05 eV. The electronic energy was considered self-consistent when the energy change was smaller than  $10^{-5}$  eV. A geometry optimization was considered convergent when the force change was smaller than 0.02 eV / Å. Grimme's DFT-D3 methodology was used to describe the dispersion interactions.

The equilibrium lattice constants of hexagonal  $\text{LiNiO}_2$  unit cell (model 0) were optimized, when using a  $15 \times 15 \times 3$  Monkhorst-Pack k-point grid for Brillouin zone sampling, to be  $a=b=2.831$  Å,  $c=13.824$  Å. Then it was used to construct a  $\text{LiNiO}_2$  supercell with  $3 \times 3 \times 1$  periodicity. It comprises of 27 Li, 27 Ni and 54 O atoms. During structural optimizations, the  $\Gamma$  point in the Brillouin zone was used for k-point sampling, and all

atoms were allowed to fully relax.

3. *The formation energy of oxygen vacancy.*

The formation energy of oxygen vacancy was calculated by the following formula:

$$\Delta E_{\text{form}}(\text{Vo}) = E(\text{defect}) - E(\text{perfect}) + 1/2 E_{\text{gas}}(\text{O}_2)$$

Where the  $\Delta E_{\text{form}}(\text{Vo})$ ,  $E(\text{defect})$ ,  $E(\text{perfect})$ ,  $E_{\text{gas}}(\text{O}_2)$  represents formation energy of oxygen vacancy, the total energy of bulk with and without oxygen vacancy, and the energy of  $\text{O}_2$  molecule in the gas phase, respectively.

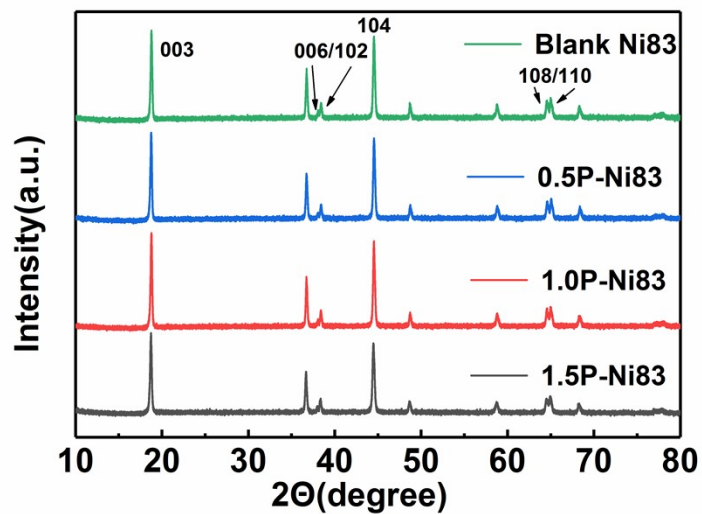

**Figure S1.** XRD patterns of Blank Ni83, 0.5P-Ni83, 1.0P-Ni83 and 1.5P-Ni83 cathodes.

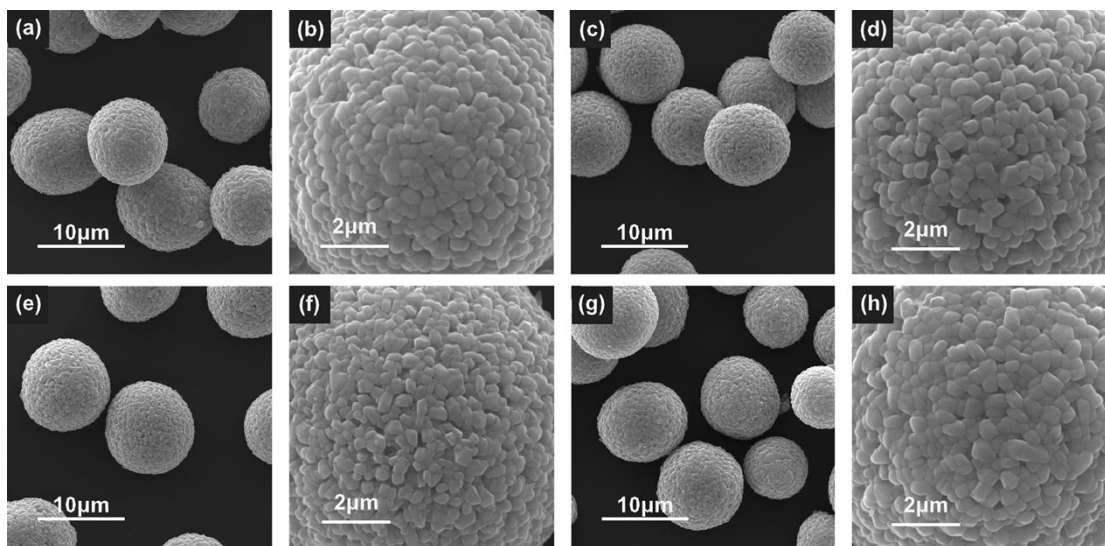

**Figure S2.** The SEM images of a, b) Blank Ni83, c, d) 0.5P-Ni83, e, f) 1.0P-Ni83 and g, h) 1.5P-Ni83.

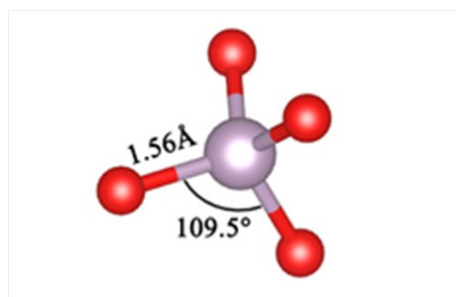

**Figure S3** The structures of  $\text{PO}_4^{3-}$ .

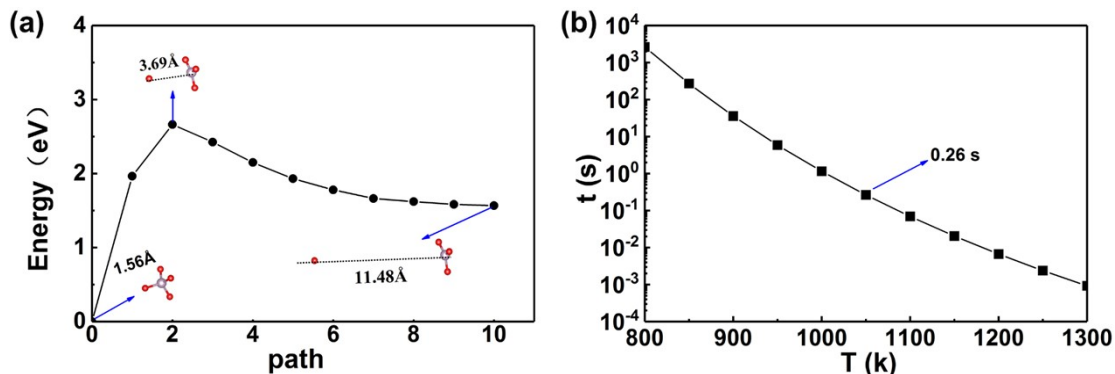

**Figure S4** a) The energy barrier corresponding to the P-O bond breaking of  $\text{PO}_4^{3-}$ . b) The time to break a P-O bond of  $\text{PO}_4^{3-}$  vs. the temperature.

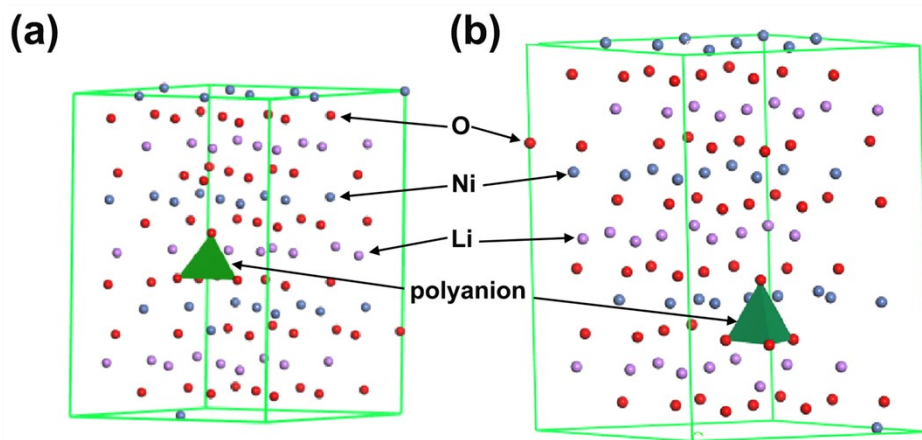

**Figure S5** a) model 1: P in Li layer. b) model 2: P in Ni layer.

**Table S1** Calculation results of different model energy.

| gas molecules          |                       | model 0: pristine                 |                       |                           | model 1: P in Li layer            |                       |                           |
|------------------------|-----------------------|-----------------------------------|-----------------------|---------------------------|-----------------------------------|-----------------------|---------------------------|
| molecule               | $E_{\text{tot}}$ (eV) | model                             | $E_{\text{tot}}$ (eV) | $E_{\text{f, Ovac}}$ (eV) | model                             | $E_{\text{tot}}$ (eV) | $E_{\text{f, Ovac}}$ (eV) |
| $\text{O}_2(\text{g})$ | -9.852                | *                                 | -628.508              |                           | *                                 | -635.100              |                           |
|                        |                       | [with 1 $\text{O}_{\text{vac}}$ ] | -621.796              | 1.79                      | [with 1 $\text{O}_{\text{vac}}$ ] | -627.404              | 2.77                      |

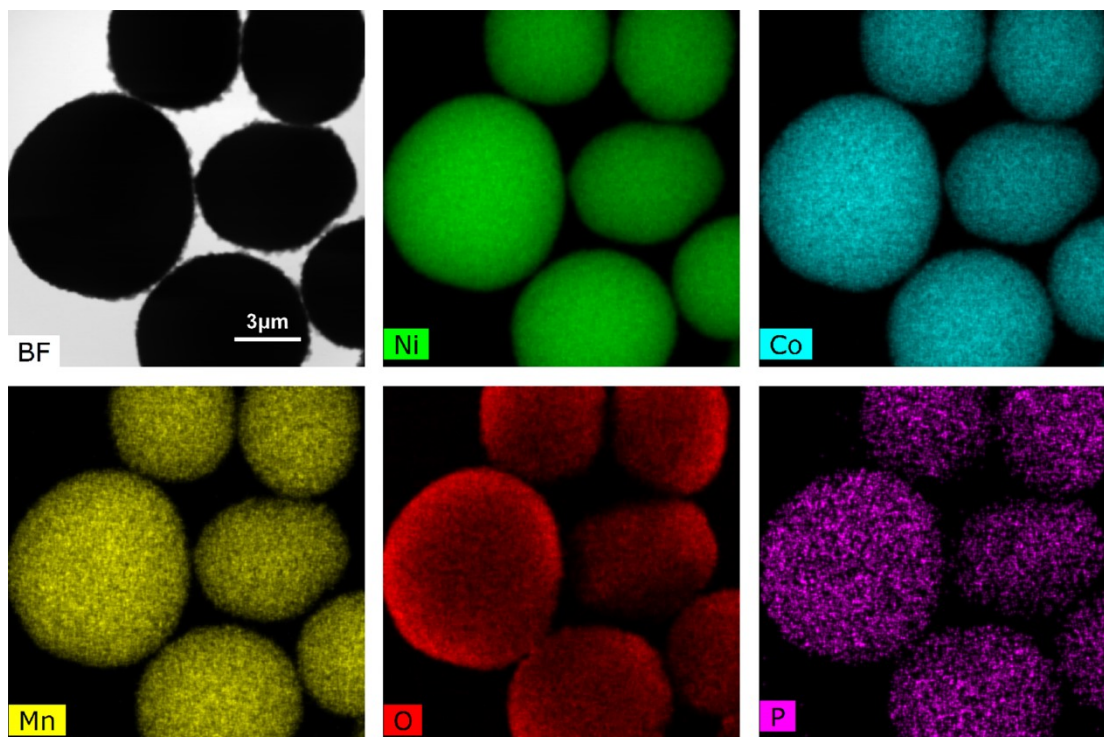

**Figure S6.** EDS mapping of Ni, Co, Mn, O and P of 1.0P-Ni83.

**Table S2.** Element composition of the bulk particles for Blank Ni83 and 1.0P-Ni83 by ICP-AES.

| Sample     | Li (mol%) | Ni (mol%) | Co (mol%) | Mn (mol%) | P (mol%) |
|------------|-----------|-----------|-----------|-----------|----------|
| Blank Ni83 | 102.021   | 83.004    | 12.314    | 4.681     | 0        |
| 1.0P-Ni83  | 102.700   | 83.019    | 12.337    | 4.641     | 0.813    |

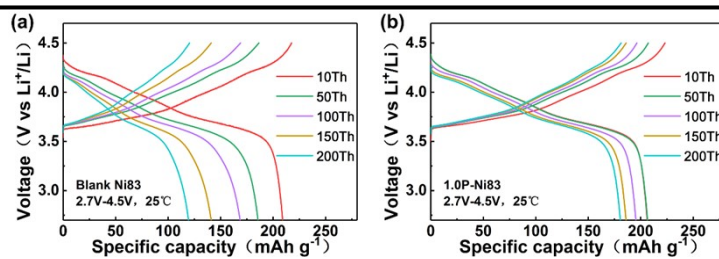

**Figure S7.** a, b) Typical charge-discharge profiles of Blank Ni83 and 1.0P-Ni83 between 2.7-4.5 V at 25 °C.

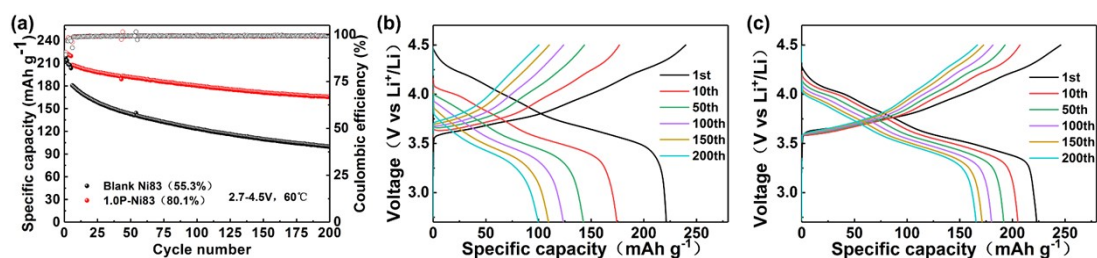

**Figure S8.** a) Cycle performance between 2.7-4.5 V at 60 °C of Blank Ni83 and 1.0P-Ni83. b, c) Typical charge-discharge profiles of Blank Ni83 and 1.0P-Ni83 between 2.7-4.5 V at 60 °C.

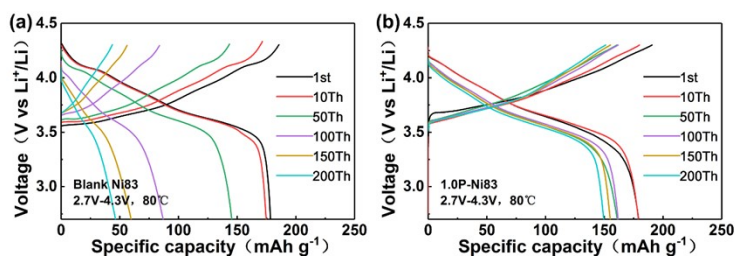

**Figure S9.** a, b) Typical charge-discharge profiles of Blank Ni83 and 1.0P-Ni83 between 2.7-4.3 V at 80 °C.

**Table S3.** Electrochemical performance comparison for Blank Ni83 and 1.0P-Ni83.

| Sample     | 2.7-4.5 V, 25 °C                              |                    | 2.7-4.3 V, 60 °C                              |                    | 2.7-4.5 V, 60 °C                              |                    | 2.7-4.3 V, 80 °C                              |                    |
|------------|-----------------------------------------------|--------------------|-----------------------------------------------|--------------------|-----------------------------------------------|--------------------|-----------------------------------------------|--------------------|
|            | Capacity                                      |                    | Capacity                                      |                    | Capacity                                      |                    | Capacity                                      |                    |
|            | at 1C<br>(mAh g <sup>-1</sup> ) <sup>1)</sup> | 200Cs<br>retention | at 1C<br>(mAh g <sup>-1</sup> ) <sup>1)</sup> | 500Cs<br>retention | at 1C<br>(mAh g <sup>-1</sup> ) <sup>1)</sup> | 200Cs<br>retention | at 1C<br>(mAh g <sup>-1</sup> ) <sup>1)</sup> | 200Cs<br>retention |
| Blank Ni83 | 202                                           | 52.4%              | 179                                           | 21.4%              | 182                                           | 55.3%              | 180                                           | 11.4%              |
| 1.0P-Ni83  | 197                                           | 88.3%              | 180                                           | 80.2%              | 208                                           | 80.1%              | 178                                           | 84.7%              |



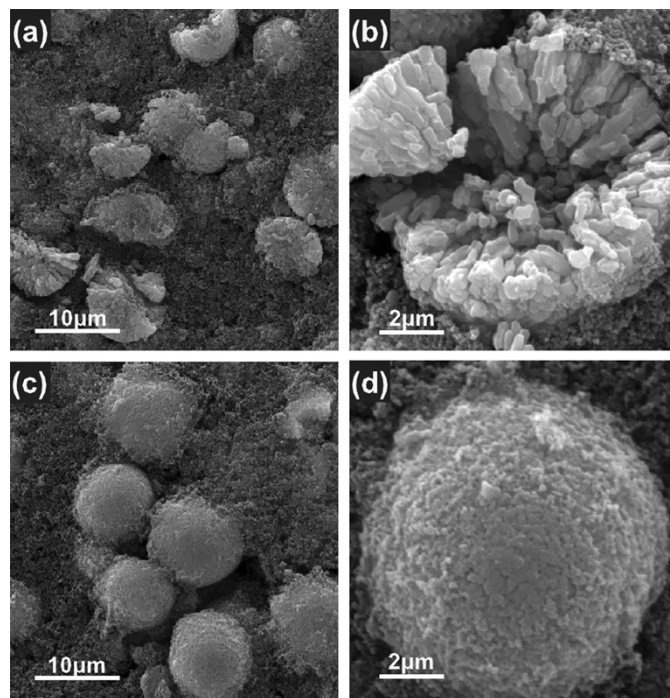

**Figure S10.** SEM images after 200 cycles between 2.7-4.3 V at 60 °C of a, b) Blank Ni83 electrode c, d) 1.0P-Ni83 electrode.

**Table S4.** The fitted impedance parameters of equivalent circuits.

| Cycle | $R_f$ /ohm |           | $R_{ct}$ /ohm |           |
|-------|------------|-----------|---------------|-----------|
|       | Blank Ni83 | 1.0P-Ni83 | Blank Ni83    | 1.0P-Ni83 |
| Fresh | --         | --        | 25.64         | 24.83     |
| 50th  | 65.99      | 55.72     | 227.20        | 86.04     |
| 100th | 154.90     | 63.39     | 648.10        | 140.40    |

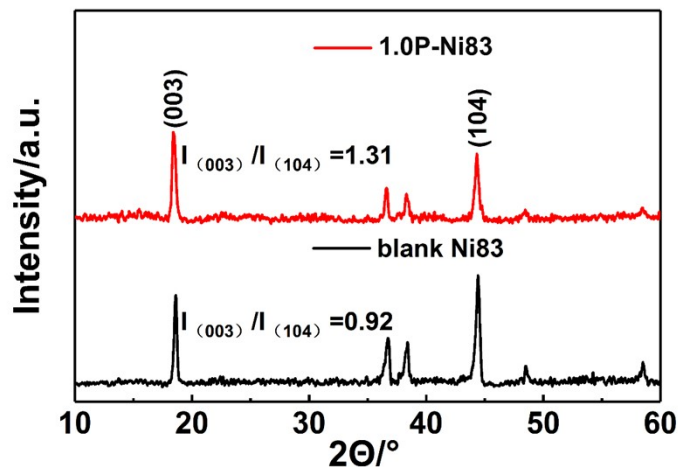

**Figure S11.** XRD patterns after 200 cycles between 2.7-4.3 V at 60 °C of Blank Ni83 electrode and 1.0P-Ni83 electrode.

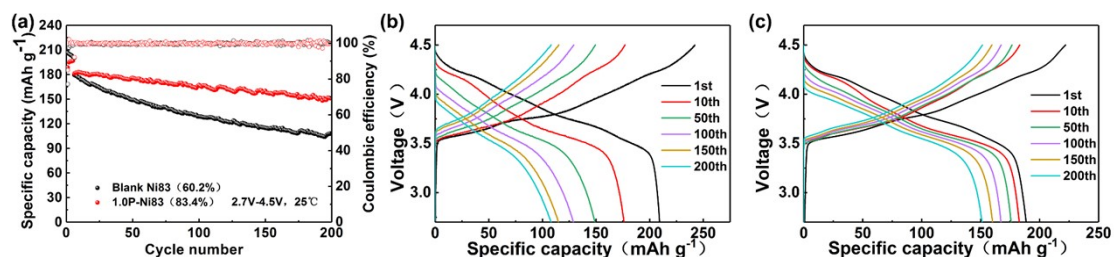

**Figure S12.** a) Cycling performance of full cell for Blank Ni83 and 1.0P-Ni83 at 1 C between 2.7-4.5 V at 25 °C. b, c) Typical charge-discharge profiles of full cell for Blank Ni83 and 1.0P-Ni83 between 2.7-4.5 V at 25 °C.

## References

- [1] Kresse, G.; Furthmüller, Comput. Mater. Sci. 1996, 6, 15-50, doi:10.1016/0927-0256(96)00008-0.
- [2] Kresse, G.; Furthmüller, Phys. Rev. B 1996, 54, 11169–11186, doi:10.1103/PhysRevB.54.11169.
- [3] Perdew, J. P.; Burke, K.; Ernzerhof, Phys. Rev. Lett. 1996, 77, 3865-3868,

doi:10.1103/PhysRevLett.77.3865.

[4] Kresse, G.; Joubert, D. Phys. Rev. B 1999, 59, 1758-1775,

doi:10.1103/PhysRevB.59.1758.

[5] Blöchl, P. E. Phys. Rev. B 1994, 50, 17953-17979, doi:10.1103/PhysRevB.50.17953.

[6] E.R. McNellis, J. Meyer, K. Reuter, Phys. Rev. B 80 (2009),

doi:10.1103/PhysRevB.80.205414.

[7] Parlinski K, Li Z Q, Kawazoe Y. Physical Review Letters, 1997, 78(21): 4063,

doi:10.1103/PhysRevLett.78.4063.

[8] Henkelman G, Uberuaga B P, Jónsson H. The Journal of chemical physics, 2000,

113(22): 9901-9904, doi:10.1063/1.1329672.
